# Supplementary material
Source: Springer Nature journal article supplement (https://www.springermedizin.de/resource/supplementary/12936_2007_528_MOESM1_ESM.pdf/9548202)
Supplement: MOESM1 [file 9548202]

## Diagnostic Support

- Testing constraints
- Established processes
- Lack of supervision

## Disease Promotion

- Malaria campaigns
- Guidelines and training malaria-centred

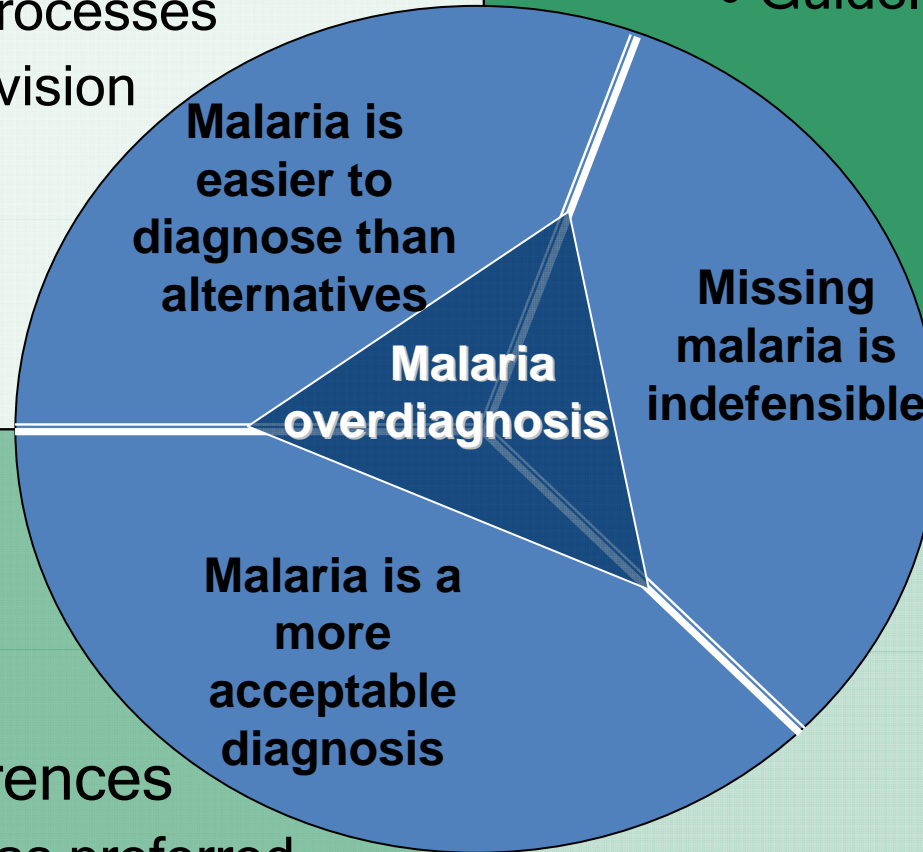

## Patient preferences

- Malaria seen as preferred by patients
- Low stigma disease

## Peer Pressure

- Experience of need to conform
- Can't miss most important disease
